RESEARCH ARTICLE

# Comparing Acute Effects of a Nano-TiO<sub>2</sub> Pigment on Cosmopolitan Freshwater Phototrophic Microbes Using High-Throughput Screening

Chu Thi Thanh Binh<sup>1</sup>, Christopher G. Peterson<sup>2</sup>, Tiezheng Tong<sup>3</sup>, Kimberly A. Gray<sup>3</sup>, Jean-François Gaillard<sup>3</sup>, John J. Kelly<sup>1\*</sup>

**1** Department of Biology, Loyola University Chicago, Chicago, Illinois, United States of America, **2** Institute of Environmental Sustainability, Loyola University Chicago, Chicago, Illinois, United States of America, **3** Department of Civil and Environmental Engineering, Northwestern University, Evanston, Illinois, United States of America

\* [jkelly7@luc.edu](mailto:jkelly7@luc.edu)

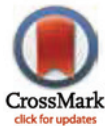

OPEN ACCESS

**Citation:** Binh CTT, Peterson CG, Tong T, Gray KA, Gaillard J-F, Kelly JJ (2015) Comparing Acute Effects of a Nano-TiO<sub>2</sub> Pigment on Cosmopolitan Freshwater Phototrophic Microbes Using High-Throughput Screening. PLoS ONE 10(4): e0125613. doi:10.1371/journal.pone.0125613

**Academic Editor:** Amitava Mukherjee, VIT University, INDIA

**Received:** December 8, 2014

**Accepted:** March 24, 2015

**Published:** April 29, 2015

**Copyright:** © 2015 Binh et al. This is an open access article distributed under the terms of the [Creative Commons Attribution License](https://creativecommons.org/licenses/by/4.0/), which permits unrestricted use, distribution, and reproduction in any medium, provided the original author and source are credited.

**Data Availability Statement:** All relevant data are within the paper.

**Funding:** The work described in this study was performed with support from the National Science Foundation (Grant No. CBET-1067439 to JK and CP and Grant No. CBET-1067751 to KG and J-FG). The funder had no role in study design, data collection and analysis, decision to publish, or preparation of the manuscript.

**Competing Interests:** The authors have declared that no competing interests exist.

## Abstract

Production of titanium-dioxide nanomaterials (nano-TiO<sub>2</sub>) is increasing, leading to potential risks associated with unintended release of these materials into aquatic ecosystems. We investigated the acute effects of nano-TiO<sub>2</sub> on metabolic activity and viability of algae and cyanobacteria using high-throughput screening. The responses of three diatoms (*Surirella angusta*, *Cocconeis placentula*, *Achnantheidium lanceolatum*), one green alga (*Scenedesmus quadricauda*), and three cyanobacteria (*Microcystis aeruginosa*, *Gloeocapsasp.*, *Synechococcus cedrorum*) to short-term exposure (15 to 60 min) to a common nano-TiO<sub>2</sub> pigment (PW6; average crystallite size 81.5 nm) with simulated solar illumination were assessed. Five concentrations of nano-TiO<sub>2</sub> (0.5, 2.5, 5, 10, and 25 mg L<sup>-1</sup>) were tested and a fluorescent reporter (fluorescein diacetate) was used to assess metabolic activity. Algae were sensitive to nano-TiO<sub>2</sub>, with all showing decreased metabolic activity after 30-min exposure to the lowest tested concentration. Microscopic observation of algae revealed increased abundance of dead cells with nano-TiO<sub>2</sub> exposure. Cyanobacteria were less sensitive to nano-TiO<sub>2</sub> than algae, with *Gloeocapsa* showing no significant decrease in activity with nano-TiO<sub>2</sub> exposure and *Synechococcus* showing an increase in activity. These results suggest that nanomaterial contamination has the potential to alter the distribution of phototrophic microbial taxa within freshwater ecosystems. The higher resistance of cyanobacteria could have significant implications as cyanobacteria represent a less nutritious food source for higher trophic levels and some cyanobacteria can produce toxins and contribute to harmful algal blooms.

## Introduction

Nano-TiO<sub>2</sub> is one of the most widely used engineered nanomaterials with a broad range of commercial and industrial applications [1–3], and its production and use are increasing rapidly [4]. One of the most common applications of nano-TiO<sub>2</sub> is as a pigment in paints [5], personal-care products (e.g. cosmetics, toothpaste, shampoo, lotions) and food (e.g. milk, candies, sweets, chewing gum, salad dressing) [2,6]. All of these products have the potential to release nano-TiO<sub>2</sub> to the environment, leading to significant concerns about the possible environmental effects of these materials. Aquatic habitats are especially at risk for nano-TiO<sub>2</sub> contamination due to inputs from urban and suburban runoff and human wastewater [7–9].

Nano-TiO<sub>2</sub>, particularly anatase, is cytotoxic due mainly to its production of reactive oxygen species (ROS) when illuminated [10], and the toxicity of nano-TiO<sub>2</sub> has been demonstrated for a variety of aquatic organisms, including fish [11–13], invertebrates [14–16], bacteria [15–18] and algae [19,20]. Algae are critical members of many freshwater ecosystems due to their role as primary producers at the base of the food web. Previous studies have shown that nano-TiO<sub>2</sub> exposure can inhibit growth and decrease viability for several algal species, including *Scenedesmus* sp. and *Chlorella* sp. [21–23], *Chlamydomonas reinhardtii* [24,25], and *Pseudokirchneriella subcapitata* [26–28]. Most assessments of algal responses to nano-TiO<sub>2</sub> have exposed algae to nano-TiO<sub>2</sub> in artificial growth media, but the differences in physicochemical characteristics between growth media and natural surface waters (e.g. organic carbon concentration and ionic strength) could affect nano-TiO<sub>2</sub> properties such as aggregation [29,30]. Thus, results from studies conducted using artificial growth media might not be representative of microbial responses in natural surface waters. A recent study addressed this issue by using soil extract media as a proxy for natural surface water and demonstrated no significant relationship between growth rate (in 25 day batch cultures) and nano-TiO<sub>2</sub> concentration for 10 species of freshwater phytoplankton [31]. The use of growth rate as the response variable in determining nano-TiO<sub>2</sub> effects on algae requires long incubation times (days to weeks) and limits the number of nanomaterials, concentrations and replicates that can be analyzed in parallel. Several recent studies have demonstrated the utility of rapid, high-throughput screening for determining acute bacterial responses to engineered nanomaterials including nano-TiO<sub>2</sub> [10,17,18,32–35], but this approach has received limited application to algae.

Cyanobacteria can also be significant contributors to primary production in freshwater ecosystems [36], although cyanobacteria are a less nutritious food source than algae for aquatic consumers due to their higher carbon to nitrogen ratio and lower digestibility [37]. Cyanobacteria are also significant because some taxa can produce toxins, and as a result cyanobacterial blooms can be a significant hazard to human and animal health [38]. Few studies have explored the effects of nano-TiO<sub>2</sub> on cyanobacteria, although one recent study demonstrated that nano-TiO<sub>2</sub> exposure inhibited the growth rate and nitrogen fixation activity of the cyanobacterium *Anabaena variabilis* [39] and another reported no significant relationship between growth rate and nano-TiO<sub>2</sub> concentration for *Anabaena* and *Oscillatoria* [31]. Previous studies have demonstrated that cyanobacteria are more resistant to a variety of stressors than algae, including antimicrobial compounds [40,41], but direct comparisons of algal and cyanobacterial responses to nano-TiO<sub>2</sub> exposure have been limited.

The goal of this study was to investigate the acute effects of a common nano-TiO<sub>2</sub> pigment on cosmopolitan freshwater phototrophic microbes, including both algae and cyanobacteria, using a high-throughput screening approach with an environmentally relevant medium. Specifically, we assessed the responses of three diatom species (*Surirella angusta*, *Cocconeis placentula*, *Achnanthisidium lanceolatum*), one green algal species (*Scenedesmus quadricauda*), and three species of cyanobacteria (*Microcystis aeruginosa*, *Gloeocapsa* sp., *Synechococcus*

*cedrorum*) to short-term exposure to Pigment White 6 (PW6) in Lake Michigan water under simulated solar irradiation. Metabolic activity of the microorganisms was measured with a fluorescence-based esterase activity assay, and microscopic observation was also used to assess cell damage for the algae.

## Materials and Methods

### Water matrix and nano-TiO<sub>2</sub>

Lake Michigan water (LMW) was collected in Evanston, IL and transported to the lab on ice in a cooler. LMW was filtered through 0.22 µm Millipore filters and stored at 4°C in the dark. Characterization of LMW was reported in our previous study [10].

The nanotitania pigment Pigment White 6 (PW6) was purchased from J.T. Baker (Cat. 4162-01). This PW6 was previously characterized as 100% anatase with an average crystallite size of 81.5 nm and an average aggregate size in LMW of 303 nm [10], and its aggregation kinetics in LMW were previously reported [17]. Nano-TiO<sub>2</sub> stock solutions were prepared by adding 2 g of PW6 to 1 L of Milli-Q water. Stock solutions were sonicated in an ultrasonic bath (Health-Sonics, 110W, 42 kHz) for 30 min and then diluted with Milli-Q water to the desired concentrations for the high-throughput assay. Five dilutions were prepared to give final concentrations in the high-throughput assay of 0.5, 2.5, 5, 10, and 25 mg L<sup>-1</sup>.

### Microbial cultures

Seven phototrophic microbial species commonly found in freshwater ecosystems were obtained from the Culture Collection of Algae at the University of Texas at Austin (Austin, TX, USA): *Achnanthydium lanceolatum* (UTEX LB FD178), *Cocconeis placentula* var. *lineata* (UTEX LB FD44), *Surirella angusta* (UTEX LB FD82), *Scenedesmus quadricauda* (UTEX LB 614), *Synechococcus cedrorum* (UTEX LB 1191), *Microcystis aeruginosa* (UTEX LB 2061), and *Gloeocapsa* sp. (UTEX LB 1938). *A. lanceolatum*, *C. placentula*, *S. angusta*, and *S. quadricauda* were cultured in Chu's #10 medium. *S. cedrorum* was cultured in BG-11, and *M. aeruginosa* and *Gloeocapsa* were cultured in Bold 3N medium. All cultures were incubated at 20°C for 4 weeks with light intensity of 8.8 W m<sup>-2</sup> and on a 14:10 hour light: dark photo cycle. Growth of all strains was monitored during the incubation and at week 4 all strains were in exponential growth phase and the cells looked healthy under the microscope. Cells were harvested from each culture by centrifugation and washed twice with filtered LMW. Cells were then resuspended in filtered LMW and adjusted to an optical density at 600 nm (OD<sub>600</sub>) of approximately 0.3 and immediately used for the high-throughput assay. Preliminary experiments indicated that this cell density was required to produce an adequate signal in the HTS assay.

### High-throughput screening assessment of metabolic activity

High-throughput screening (HTS) was used to assess the effect of PW6 on the metabolic activity of the phototrophic microorganisms, with fluorescein diacetate (FDA; Molecular Probes, Life Technologies, Grand Island, NY) used as an indicator of esterase enzyme activity. FDA is colorless, non-fluorescent and membrane permeable, and when FDA enters a cell it is hydrolyzed by nonspecific intracellular esterases resulting in the production of fluorescein, which is fluorescent and not membrane permeable. FDA has been used for decades as an indicator of metabolic activity in algae and has been shown to correlate with photosynthetic activity [42], but it has not been used previously for HTS. In the HTS assay 25 µL of cell suspensions in LMW (prepared as described above) and 25 µL of PW6 solutions (prepared as described above to give final concentration in the assay of 0, 0.5, 2.5, 5, 10, and 25 mg L<sup>-1</sup>) were added to

individual wells of 384-well clear-bottom microwell plates using a robotic liquid handler (Bio-mek FX, Beckman Coulter). Four replicate wells were used for each treatment. Each plate was incubated at room temperature (approximately 22°C) with shaking at 300 rpm on an orbital shaker and illuminated using a xenon arc lamp emitting simulated solar illumination (Model 6271, Newport) at 280–849 nm with an intensity of approximately 200 W m<sup>-2</sup>. The spectral distribution of the lamp was reported in an earlier publication [10]. The measured light intensity and spectrum of the light source were comparable to those of natural solar irradiation [43,44]. Illumination for 60 min increased the temperature within the wells by 3–4°C. To avoid evaporation each plate was covered with an ultraclear film (Axygen, UC-500) that has been shown previously to have a negligible effect on light intensity and spectrum distribution [10]. We also tested in parallel the effect of nano-titania without illumination by covering a section of each microwell plate with aluminum foil. After 15, 30 or 60 min of incubation in the HTS assay plates, 25 µL FDA solution (prepared as instructed by manufacturer) was added to each well by the robotic liquid handler, producing a final concentration of 10 µM in each well, and the microplates were incubated for 1 h in the dark. A microplate reader (Synergy 4, BioTek) was then used to measure fluorescence (excitation 490 nm and emission 520 nm) in each well. Each experiment included a set of control wells containing the full range of nano-titania concentrations but no cells. These abiotic controls demonstrated that the nano-titania concentrations used in our study had no direct effects on the fluorescent signals produced by FDA. Each experiment included an additional set of control wells containing cells but no FDA, and these controls confirmed that the cells alone did not produce a fluorescent signal under the conditions of the FDA assay. In addition, each experiment included a set of no treatment controls, which contained cells but were not incubated in the microwell plates and were not exposed to the simulated solar illumination. These no-treatment controls enabled assessment of metabolic activity immediately prior to the start of the HTS incubations. Finally, for each microbial species a set of standards was prepared by mixing viable and non-viable cells (20 minutes boiled) at several ratios (100% viable, 80% viable: 20% non-viable, 50% viable: 50% non-viable; 20% viable: 80% non-viable; 100% non-viable). Each standard was added to four replicate wells of the tested microplate after completion of the incubation with PW6. FDA solution was added simultaneously to all treatment and standard wells, and the microwell plates were incubated for 1 h in the dark and fluorescence measured with the microplate reader. Calibration curves were constructed for each species based on the fluorescence intensity of the standards, and the percentage of enzyme activity in each test sample was calculated based on the fluorescence intensity and the calibration curve. All seven species used in this study generated calibration curves with correlation coefficients ( $r^2$  values) greater than 0.98. The inhibition concentration, defined here as the concentration of nano-TiO<sub>2</sub> that reduced metabolic activity by 25% (IC<sub>25</sub>), was calculated for each taxa based on the linear interpolation method [45].

### Assessment of algal viability by light microscopy

After completion of the HTS assay algal cells from several of the experimental wells were collected and observed under light microscope. Specifically, solutions from the 0, 0.5 and 25 mg L<sup>-1</sup> PW6 wells were collected with pipets and applied to slides. Slides were observed with a 100X oil immersion objective using a BH-2 microscope (Olympus America, Inc., Center Valley, PA, USA). From one starting point each slide was moved in one direction and the first 100 cells were examined and ranked as either healthy, damaged or dead following a previously published method [46,47]. Briefly, cells with intact cell walls and membranes and abundant chloroplasts were ranked as healthy; cells with reduced chloroplasts and/or damaged cell walls and cytoplasm leaking out from the cells were ranked as damaged; and cells with no cytoplasm

remaining within the cell wall were ranked as dead. Three replicate slides were prepared and analyzed for each treatment.

### Assessment of cyanobacterial viability by high-throughput screening

The effect of PW6 on the relative abundance of viable cells was assessed for one cyanobacterial species, *Synechococcus cedrorum*, due to its unique response to nano-TiO<sub>2</sub> exposure in the metabolic activity assay (see [Results](#) section below). The relative abundance of viable *S. cedrorum* cells was determined using the HTS platform and the Live/Dead BacLight Bacterial viability kit (Molecular Probes) as described previously [17]. The BacLight kit allows determination of the relative abundance of viable bacterial cells within a culture based on the relative signal intensity of two fluorescent dyes, SYTO9, which is membrane permeable, and propidium iodide (PI), which is not membrane permeable and quenches SYTO9. A change in the ratio of the fluorescent signals produced by SYTO9 (green) and PI (red) indicates a change in the relative number of viable bacterial cells, with viable cells defined as those with an intact cell membrane that is impermeable to PI.

*Synechococcus* was cultured and exposed to PW6 in the HTS platform as described above, but after exposure to PW6 for 15, 30 or 60 min 25  $\mu$ L of BacLight probe solution (prepared according to manufacturer's instructions) was robotically added to each well. A set of standards with known ratios of viable and non-viable *Synechococcus* cells was also prepared as described above and added to each microwell plate, with each standard well also receiving the BacLight probe solution. Microplates were incubated for 15 min in the dark and the microplate reader was used to measure green fluorescence (excitation 485 nm and emission 530 nm) and red fluorescence (excitation 485 nm and emission 630 nm) in each well. The ratios of green: red fluorescence intensities were calculated for each well and a calibration curve was constructed based on the green: red fluorescence ratios of the standards. The percentage of viable *Synechococcus* cells in each experimental well was then calculated based on the measured green: red fluorescence ratios in the wells and the calibration curve.

### Statistical analysis

Two-way ANOVA was used to test the effects of PW6 treatment and exposure time on esterase activity and cyanobacterial viability determined via HTS. No transformations were performed because the residuals were homoscedastic and normally distributed. In cases of significant interaction effects, one-way ANOVA was used to test the main effects. Percentages of healthy, damaged and dead algal cells obtained from microscopic observations were arc sine square root transformed and then analyzed by two-way ANOVA and one-way ANOVA as above. In cases of significant treatment effects, Tukey's post hoc tests were used for pairwise comparisons. All statistical analyses were performed with Systat version 13 (Systat Software, Inc.) and in all cases a p value of 0.05 was considered the threshold for statistical significance.

## Results

### Effect of nano-TiO<sub>2</sub> on algal metabolic activity assessed by HTS

Two-way ANOVA indicated significant effects of nano-TiO<sub>2</sub> treatment and exposure time on metabolic activity for all four algal species tested with the HTS assay ( $p < 0.05$ ), with significant interaction effects for *S. angusta*, *A. lanceolatum*, and *S. quadricauda* ( $p < 0.05$ ), but no significant interaction effect for *C. placentula* ( $p = 0.185$ ). All four algal species were sensitive to simulated solar illumination alone as indicated by the lower activity values in the 0 mg L<sup>-1</sup> controls as compared to the no treatment (Nt) controls, which were not exposed to light ([Fig 1](#)).

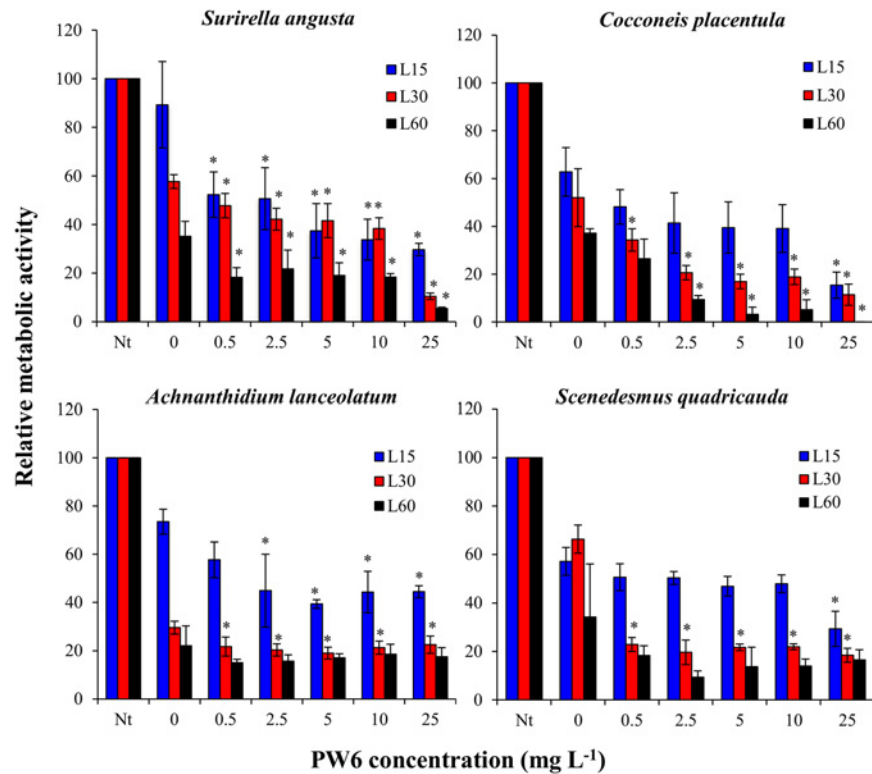

**Fig 1. Relative metabolic activity of algae in Lake Michigan water after 15 min (L15), 30 min (L30) and 60 min (L60) exposure under simulated sunlight to nano-TiO<sub>2</sub> (PW6).** Values are reported as mean of 4 replicates ± standard deviation. Nt: no treatment control prior to exposure. Data points marked by asterisks are significantly different (p<0.05) from the 0 mg L<sup>-1</sup> nano-TiO<sub>2</sub> control.

doi:10.1371/journal.pone.0125613.g001

Therefore, assessments of nano-TiO<sub>2</sub> effects were based on comparisons between nano-TiO<sub>2</sub> treatments and the 0 mg L<sup>-1</sup> controls. All four algal species showed significantly decreased activity after 30 min exposure to the lowest tested nano-TiO<sub>2</sub> concentration (0.5 mg L<sup>-1</sup>) (p<0.05), and higher nano-TiO<sub>2</sub> concentrations generally led to further decreases in activity (Fig 1). Exposure time also had a significant effect on metabolic activity for all four algal species (p<0.05) with longer exposure times generally resulting in greater decreases in activity. Illumination was critical to short-term nano-TiO<sub>2</sub> toxicity, as incubation with nano-TiO<sub>2</sub> under dark conditions did not result in significant decreases in metabolic activity for any of the algal species relative to the 0 mg L<sup>-1</sup> controls (S1 Fig). Among the four tested algal species *S. angusta* was the most sensitive to nano-TiO<sub>2</sub> as it was the only species that showed a significant decrease in activity after exposure to the lowest tested nano-TiO<sub>2</sub> concentration (0.5 mg L<sup>-1</sup>) for only 15 min, and it showed an IC<sub>25</sub> for the 60 min incubation of 0.26 mg L<sup>-1</sup>. In contrast *C. placentula* and *S. quadricauda* were less sensitive to nano-TiO<sub>2</sub>, showing significant decreases in the 15 min exposure only to the highest tested nano-TiO<sub>2</sub> concentration (25 mg L<sup>-1</sup>). The IC<sub>25</sub> values for the 60 min incubations of *C. placentula* and *S. quadricauda* were 0.43 and 0.27 mg L<sup>-1</sup>, respectively. *A. lanceolatum* was intermediate in sensitivity among the four algae, showing a significant decrease in activity in the 15 min exposure at 2.5 mg L<sup>-1</sup> of nano-TiO<sub>2</sub> and an IC<sub>25</sub> in the 60 min exposure of 0.39 mg L<sup>-1</sup>. Overall the responses of the four algal species to nano-TiO<sub>2</sub> exposure in the HTS assay followed similar trends of decreased metabolic activity at higher nano-TiO<sub>2</sub> concentrations.

### Microscopic observation to assess the effects of nano-TiO<sub>2</sub> on algal cells

Cell damage was readily apparent in microscopic observations of *S. angusta*, *C. placentula* and *S. quadricauda* cells that were exposed to nano-TiO<sub>2</sub> with simulated solar illumination in the HTS assay (Fig 2). For example, healthy *S. quadricauda* cells were elliptical and contained abundant green chloroplasts (Fig 2A) whereas exposure to 25 mg L<sup>-1</sup> nano-TiO<sub>2</sub> for 30 min resulted in increased size of intracellular vacuoles causing an alteration of cell shape to spherical (Fig 2B). In addition, nano-TiO<sub>2</sub> treatment resulted in a decrease in the abundance of chloroplasts within *S. quadricauda* cells due to leaking of cytoplasm out of the cells, rendering cells

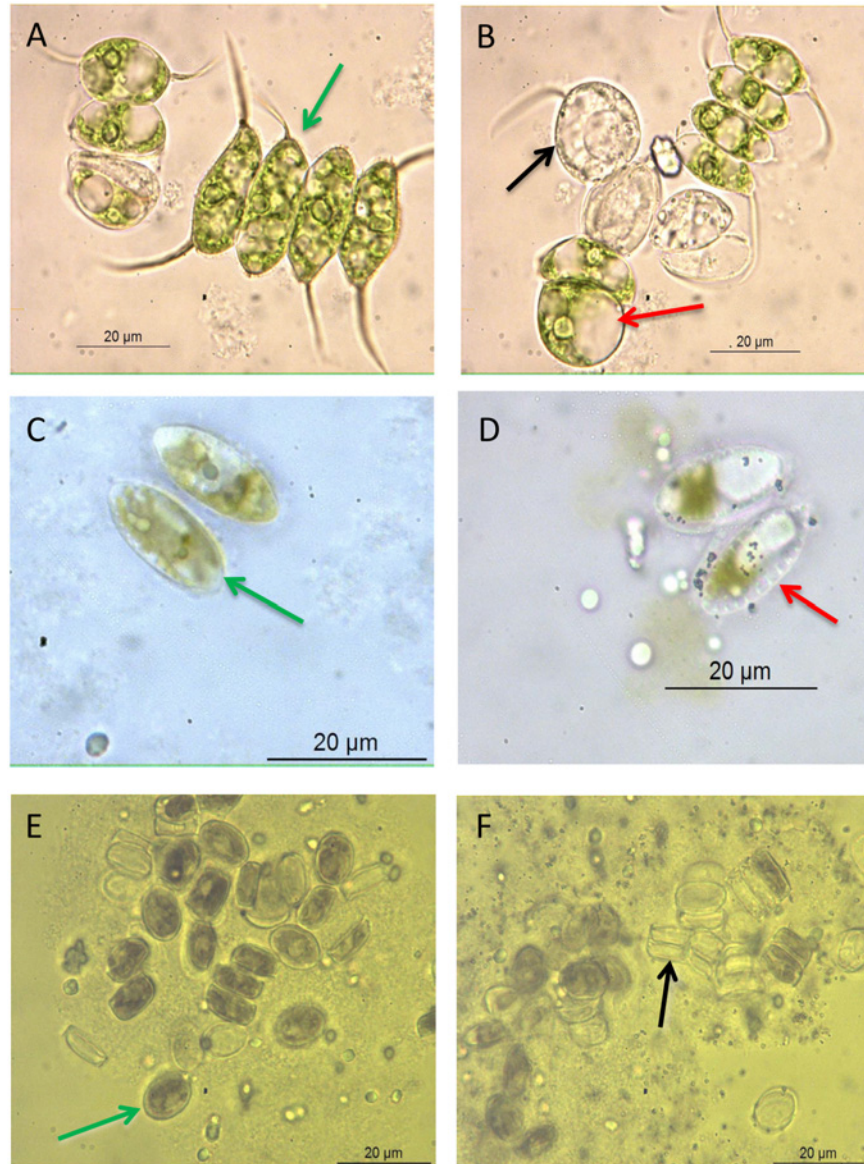

**Fig 2. Representative images from microscopic observations of algae after 30 min exposure to simulated sunlight without (A, C, E) and with 25 mg L<sup>-1</sup> nano-TiO<sub>2</sub> (B, D, F).** Organisms pictured are *Scenedesmus quadricauda* (A & B), *Surirella angusta* (C & D) and *Cocconeis placentula* (E & F). Green arrows indicate examples of healthy cells; red arrows indicate examples of damaged cells; black arrows indicate examples of dead cells.

doi:10.1371/journal.pone.0125613.g002

transparent (Fig 2B). Similarly, healthy *S. angusta* and *C. placentula* cells were pigmented (Fig 2C and 2E) and exposure to 25 mg L<sup>-1</sup> nano-TiO<sub>2</sub> for 30 min resulted in loss of cytoplasm and chloroplasts presumably due to cell wall damage, leaving empty siliceous frustules (Fig 2D and 2F). Healthy, damaged and dead *A. lanceolatum* cells could not be clearly discriminated under the microscope, so microscopic observation data are not reported for this algal species.

Microscopic observation was used to quantify the abundance of healthy, damaged and dead *S. angusta*, *C. placentula* and *S. quadricauda* cells in selected wells of the HTS metabolic assay (described above). Two-way ANOVA indicated significant effects of nano-TiO<sub>2</sub> treatment and exposure time on the abundance of healthy, damaged and dead cells for all three algal species ( $p < 0.05$ ), excepting the lack of a significant exposure-time effect on the abundance of damaged cells of *S. quadricauda* ( $p = 0.051$ ). Two-way ANOVA also indicated significant interaction effects between nano-TiO<sub>2</sub> treatment and exposure time for healthy, damaged and dead cells for *S. angusta* and *C. placentula* ( $p < 0.05$ ), but no significant interaction effects for *S. quadricauda* ( $p = 0.343$  for healthy cells,  $p = 0.984$  for damaged cells and  $p = 0.774$  for dead cells). The trends in responses were similar for all three algal species with nano-TiO<sub>2</sub> treatment resulting in significant decreases in the numbers of healthy cells, significant increases in dead cells, and almost no significant changes in the abundance of damaged cells (Fig 3). As was observed with the HTS

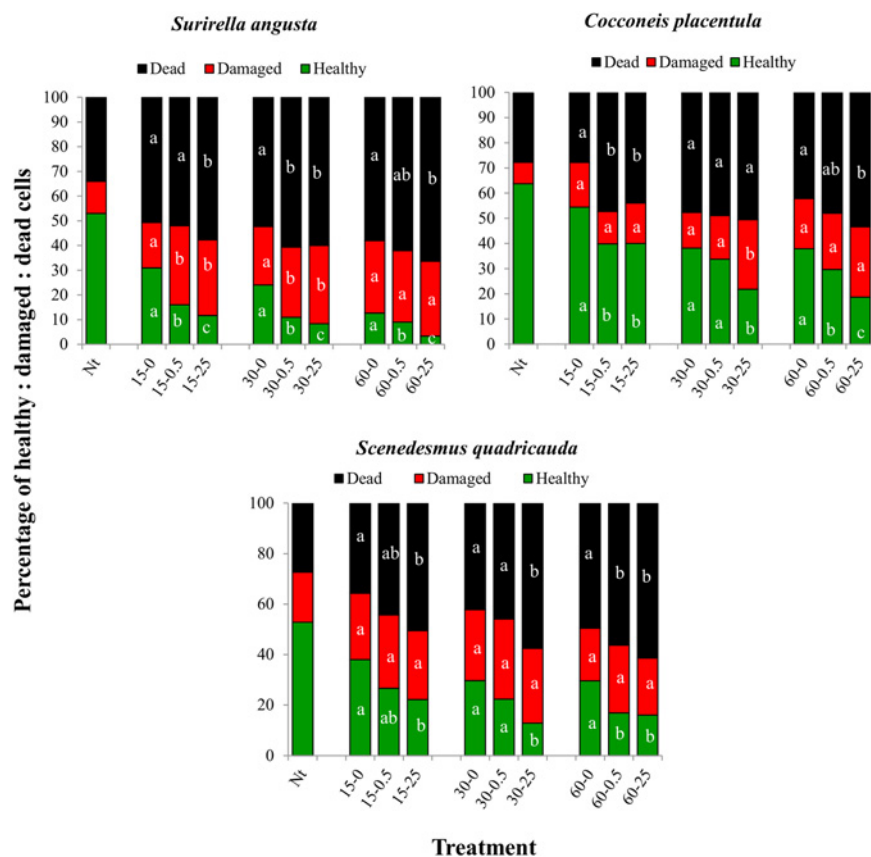

**Fig 3. Percentages of healthy, damaged and dead algal cells as identified by microscopic observation after exposure to nano-TiO<sub>2</sub> under simulated sunlight for 15, 30 and 60 min at three different nano-TiO<sub>2</sub> concentrations (0, 0.5 and 25 mg L<sup>-1</sup>).** The x-axis labels indicate exposure time and nano-TiO<sub>2</sub> dose, with these numbers separated by a hyphen (e.g. time-dose). All data are mean of 3 replicates. Nt: no treatment control prior to exposure. Data points marked by different letters are significantly different ( $p < 0.05$ ) from the 0 mg L<sup>-1</sup> nano-TiO<sub>2</sub> control.

doi:10.1371/journal.pone.0125613.g003



metabolic activity assay, *S. angusta* appeared most sensitive among the algal species to nano-TiO<sub>2</sub> exposure, as this species showed the lowest relative abundance of healthy cells in nano-TiO<sub>2</sub> treated wells. The relative abundance of healthy *C. placentula* and *S. quadricauda* also decreased significantly with nano-TiO<sub>2</sub> exposure, but to a lesser extent than observed with *S. angusta*.

### Effect of nano-TiO<sub>2</sub> on cyanobacterial species assessed by HTS

The three tested cyanobacteria, *Microcystis aeruginosa*, *Gloeocapsa* sp. and *Synechococcus cedrorum*, had distinct responses to nano-TiO<sub>2</sub> exposure in the HTS assay (Fig 4), and none of these cyanobacteria were as sensitive to nano-TiO<sub>2</sub> as the algal species discussed above (Fig 1). Two-way ANOVA indicated significant effects of nano-TiO<sub>2</sub> concentration and exposure time on metabolic activity for *M. aeruginosa* ( $p < 0.05$ ), but no significant interaction effect ( $p = 0.271$ ). The metabolic activity of *M. aeruginosa* decreased with nano-TiO<sub>2</sub> treatment, but never fell below 60% of the no-treatment controls for the 30-min exposure and never fell below 40% for the 60 minute exposure, even at a nano-TiO<sub>2</sub> concentration of 25 mg L<sup>-1</sup> (Fig 4). The IC<sub>25</sub> value for the 60 min exposure of *M. aeruginosa* was 2.7 mg L<sup>-1</sup>, which was six to ten-fold higher than the IC<sub>25</sub> values for the algal species. Two-way ANOVA indicated no significant effect of nano-TiO<sub>2</sub> treatment on *Gloeocapsa* ( $p = 0.729$ ) and no significant interaction between

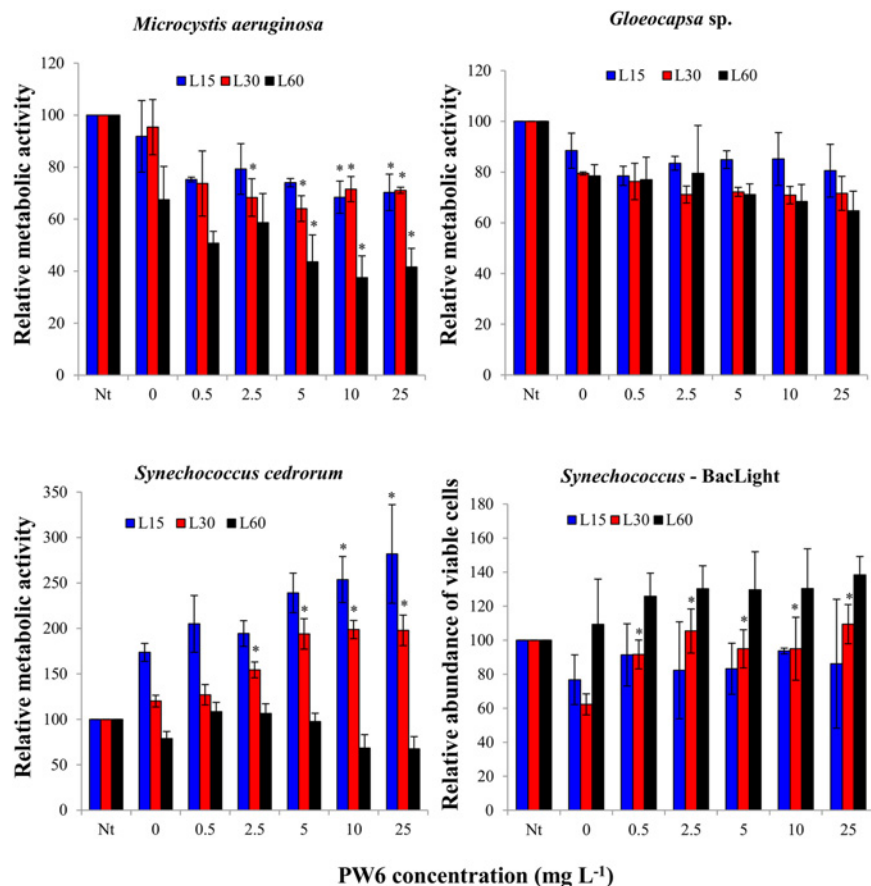

**Fig 4. Metabolic activities or relative abundance of viable cells (lower right panel only) of cyanobacteria in Lake Michigan water after 15 min (L15), 30 min (L30) and 60 min (L60) exposure under simulated sunlight to nano-TiO<sub>2</sub> (PW6).** Values are reported as mean of 4 replicates ± standard deviation. Nt: no treatment control prior to exposure. Data points marked by asterisks are significantly different ( $p < 0.05$ ) from the 0 mg L<sup>-1</sup> nano-TiO<sub>2</sub> control.

doi:10.1371/journal.pone.0125613.g004

treatment and exposure time ( $p = 0.989$ ), although there was a significant effect of exposure time ( $p < 0.05$ ), indicating some sensitivity of this species to the simulated solar illumination (Fig 4). Due to the lack of effect of the nano-TiO<sub>2</sub> treatment on metabolic activity for *Gloeocapsa* an IC25 value could not be calculated for this species. For *S. cedrorum*, two-way ANOVA indicated significant effects of nano-TiO<sub>2</sub> treatment and exposure time on metabolic activity and a significant interaction effect ( $p < 0.05$ ). Remarkably, nano-TiO<sub>2</sub> exposure resulted in an increase in metabolic activity for *S. cedrorum* in the 15 and 30 min exposures and no change in the 60 min exposure (Fig 4). Due to the lack of inhibition of *S. cedrorum* metabolic activity by nano-TiO<sub>2</sub> treatment, an IC25 value could not be calculated for this species. Finally, incubation with nano-TiO<sub>2</sub> under dark conditions did not result in significant changes in metabolic activity for any of the cyanobacterial species (S2 Fig).

To determine if the observed increase in metabolic activity in *S. cedrorum* resulting from exposure to nano-TiO<sub>2</sub> was based on an increase in cell numbers or simply an increase in the activity of the existing cells, the effect of nano-TiO<sub>2</sub> on the relative abundance of viable *S. cedrorum* cells was determined using HTS with the BacLight assay (Fig 4). Two-way ANOVA indicated no effect of nano-TiO<sub>2</sub> treatment ( $p = 0.530$ ), a significant effect of exposure time ( $p < 0.05$ ) and no significant interaction effect ( $p = 0.553$ ) on the relative abundance of viable *S. cedrorum* cells. For the 15 min exposure, one-way ANOVA showed no significant effect of nano-TiO<sub>2</sub> on the abundance of viable *S. cedrorum* cells ( $p = 0.910$ ), even though the esterase assay had shown a significant increase in metabolic activity (Fig 4), which indicates that the observed increase in metabolic activity was driven by increased activity of the existing cells, rather than by an increase in cell number. For the 30 min exposure, one-way ANOVA indicated that the nano-TiO<sub>2</sub> treatments showed a significantly higher relative abundance of viable *S. cedrorum* cells as compared to the 0 mg L<sup>-1</sup> control ( $p < 0.05$ ) (Fig 4). However, the abundance of *S. cedrorum* cells in the nano-TiO<sub>2</sub> treatments was not significantly higher than the no-treatment control; rather, the 0 mg L<sup>-1</sup> control was lower than the no-treatment control. These results indicate that there was not an increase in the number of viable *S. cedrorum* cells in the nano-TiO<sub>2</sub> treatments over the 30 min incubation, so the increase in metabolic activity with nano-TiO<sub>2</sub> treatment that was observed in the 30 min exposure was driven by increased activity of the existing *S. cedrorum* cells, rather than by an increase in cell number. Finally, there was no significant change in the abundance of viable *S. cedrorum* cells in the 60 min incubations ( $p = 0.523$ ), which paralleled the lack of change in metabolic activity of *S. cedrorum* cells in the 60 min incubations (Fig 4).

## Discussion

This study aimed to assess the potential ecological effects of nano-TiO<sub>2</sub> in freshwater ecosystems by measuring the short-term responses of several phototrophic microbial species that are abundant in freshwaters to a common nano-TiO<sub>2</sub> pigment (PW6). In this study we used a high-throughput screening (HTS) platform, which has been employed by our group and others to assess bacterial sensitivity to engineered nanomaterials [10,17,18,32–35]. We adapted this HTS platform to analyze freshwater phototrophic microbial species, including both algae and cyanobacteria. The HTS method used in this study is based on a fluorescent reporter (fluorescein diacetate; FDA) that measures esterase activity. FDA has been used in previous studies to assess the toxicity of various chemicals to algae and cyanobacteria using flow cytometers [48–50], spectrofluorometers [51,52], and plate readers [51,53]. Our HTS results showed strong correlations between the fluorescence produced by the FDA reporter and the abundance of viable cells for all tested species of algae and cyanobacteria (all correlation coefficients greater than 0.98), indicating that the FDA reporter within the HTS format is an effective indicator of

viable phototrophic microorganisms. The HTS assay required cell densities in the range of  $1 \times 10^6$  to  $5 \times 10^6$  cells mL<sup>-1</sup>, which is within the range of phytoplankton densities reported for lakes spanning a wide range of physical and chemical conditions [54,55] and is on the low end of values reported for anthropogenically influenced rivers [56,57]. Therefore, the cell concentration used in the HTS assay is environmentally relevant, especially for urban freshwater ecosystems, which are expected to receive nano-TiO<sub>2</sub> inputs.

One challenge to using HTS to assess the responses of microbes to nano-TiO<sub>2</sub> exposure is that the toxicity of nano-TiO<sub>2</sub> is driven primarily by photo-activation of this material that results in production of reactive oxygen species (ROS). However, as demonstrated in this study and our previous work [17], some microbial species are sensitive to light exposure. For example, in the current study all four algal species were sensitive to simulated solar illumination alone, especially for the longer incubation times, as indicated by the lower metabolic activity values in the 0 mg L<sup>-1</sup> nano-TiO<sub>2</sub> controls (which were exposed to light) as compared to the no-treatment controls (which were not exposed to light). There are several possible mechanisms that could explain the negative effect of illumination on algal metabolic activity. Exposure to high intensity full spectrum solar radiation (as was used in our HTS assay) can cause photoinhibition and a reduction in photosynthetic activity in algae [58–60]. Photoinhibition is believed to be caused by light-induced damage to the reaction center of Photosystem II [61]. In addition, ultraviolet radiation interacts with dissolved organic matter (DOM) in surface waters producing ROS [62], which are powerful oxidizing agents that can damage a variety of cell components. Thus it is possible that the simulated sunlight used in our HTS assay may have reacted with the DOM in the Lake Michigan water to produce ROS, which in turn damaged the algal cells. Finally, illumination did result in an increase in temperature within the wells (3–4°C), which could have affected the growth of the algae. To account for the negative effect of illumination in our HTS assay, all assessments of nano-TiO<sub>2</sub> effects in this study and our previous study [17] were based on comparisons between the nano-TiO<sub>2</sub> treatments and the 0 mg L<sup>-1</sup> nano-TiO<sub>2</sub> controls.

The results of the current study demonstrated dramatic differences in the responses of algae and cyanobacteria to acute exposure to nano-TiO<sub>2</sub> in natural surface water collected from Lake Michigan. All four algal species tested, including three diatoms and one green alga, were highly sensitive to nano-TiO<sub>2</sub>, showing significant decreases in activity after 30 min exposure to the lowest tested nano-TiO<sub>2</sub> concentration (0.5 mg L<sup>-1</sup>) and IC25 values between 0.26 and 0.43 mg L<sup>-1</sup> in the 60 min exposures. This suggests a higher sensitivity than we had observed previously for several bacterial species, including *Escherichia coli*, in the same water matrix using the same HTS platform [10,17]. These concentrations of nano-TiO<sub>2</sub> are higher than has been predicted for aquatic environments [63], but due to the ongoing, exponential increase in nano-TiO<sub>2</sub> production, nano-TiO<sub>2</sub> concentrations in the environment are likely to continue to increase [4]. In addition, due to its limited solubility, nano-TiO<sub>2</sub> will aggregate and settle out of suspension in aquatic habitats [64,65], potentially resulting in long-term accumulation of nano-TiO<sub>2</sub> in sediments. Disturbance of sediments due to natural events (e.g. storms) or anthropogenic activities could temporarily resuspend nano-TiO<sub>2</sub> from sediments [64], potentially resulting in high short-term concentrations of nano-TiO<sub>2</sub> within aquatic habitats.

The decreases in metabolic activity with nano-TiO<sub>2</sub> exposure observed for the four algal species could be indicative of viable cells decreasing their metabolic activity in response to nano-TiO<sub>2</sub> exposure, or it could be indicative of cell death due to ROS exposure from nano-TiO<sub>2</sub>. Microscopic observations of *S. angusta*, *C. placentula* and *S. quadricauda* cells collected from the HTS assay demonstrated that nano-TiO<sub>2</sub> exposure resulted in decreased abundance of viable cells and increased abundance of dead cells for all three species. The decreases in viable cells occurred at the same dosage and incubation times as the reductions in metabolic

activity, confirming that cell death contributed to the observed decline in algal metabolic activity with nano-TiO<sub>2</sub> exposure. Shading due to the absorption of light by TiO<sub>2</sub> nanoparticles has been suggested as another possible mechanism by which nano-TiO<sub>2</sub> might decrease the activity of phototrophic microorganisms [31]. However, previous studies have reported that nano-TiO<sub>2</sub> shading has a negligible effect on algae [19,26].

The three cyanobacterial species tested showed much higher resistance to nano-TiO<sub>2</sub> exposure than the algae. For example, *Gloeocapsa* showed a remarkable resistance, with no significant change in metabolic activity for any of the tested nano-TiO<sub>2</sub> concentrations or exposure times, including 25 mg L<sup>-1</sup> for 60 min. We have observed this level of resistance previously using the HTS format for one bacterial strain, *Arthrobacter* sp. [17], but the resistance of *Gloeocapsa* was much greater than we observed for the algae in this study and for several other bacterial species in prior studies, including *E. coli* [10] and *Bacillus subtilis* [17]. *S. cedrorum*, another cyanobacteria tested in the current study, was also highly resistant to nano-TiO<sub>2</sub> exposure, showing no decrease in metabolic activity even when exposed to 25 mg L<sup>-1</sup> nano-TiO<sub>2</sub> for 60 min. In fact, for the shorter exposure times (15 and 30 min) *S. cedrorum* showed higher metabolic activity with increasing nano-TiO<sub>2</sub> concentration. This increase in activity with nano-TiO<sub>2</sub> exposure parallels results of our earlier study in which two bacterial species showed increased abundance of viable cells (i.e. cell growth) with exposure to the same nano-TiO<sub>2</sub> material (PW6) in stream water using the same HTS format [17]. In that study we showed that exposure of stream water to nano-TiO<sub>2</sub> with simulated sunlight resulted in photolysis of complex organic compounds in the water, and that stream water pre-treated with nano-TiO<sub>2</sub> photolysis supported enhanced growth of bacteria, likely due to increased availability of labile carbon and inorganic nutrients [17]. In the current study *S. cedrorum* did not experience any significant increase in cell abundance with nano-TiO<sub>2</sub> treatment, likely due to the relatively short exposure times (15 to 60 min) coupled with the 3 hour generation time of *S. cedrorum* [66]. However, the 15 and 30 min nano-TiO<sub>2</sub> treatments induced significant increases in the metabolic activity of *S. cedrorum* cells; we suggest an increase in available nutrients resulting from photolysis of complex organic compounds in the Lake Michigan water by illuminated nano-TiO<sub>2</sub> as a possible mechanism. This hypothesis is supported by previous studies that have demonstrated the ability of photoactivated TiO<sub>2</sub> to oxidize organic compounds and release inorganic phosphorous [67] and nitrogen [68]. Cyanobacterial taxa differ in the degree to which growth is stimulated by increased concentrations of inorganic phosphorous and nitrogen [69]. For example, expression of the gene for glutamine synthetase in another freshwater *Synechococcus* species, *S. elongates*, has been shown to increase linearly with small increases in the availability of inorganic nitrogen [70]. Together, these observations suggest a possible mechanism for the observed increases in metabolic activity of *S. cedrorum* with short-term exposure to nano-TiO<sub>2</sub>, with no such responses noted in the two other cyanobacterial taxa we tested. In contrast to *Gloeocapsa* and *S. cedrorum*, metabolic activity in the third cyanobacterial species we tested, *Microcystis aeruginosa*, did decrease significantly with nano-TiO<sub>2</sub> exposure. This taxon has been shown in previous work by others to be sensitive to TiO<sub>2</sub> [71]. However, in our study *M. aeruginosa* activity decreased only at nano-TiO<sub>2</sub> concentrations at or above 2.5 mg L<sup>-1</sup>, as compared to 0.5 mg L<sup>-1</sup> for the algae, and *M. aeruginosa* had an IC<sub>25</sub> that was six to ten-fold higher than the IC<sub>25</sub> values for the algal species. In addition, *M. aeruginosa* maintained more than 40% of its activity when exposed to the highest tested nano-TiO<sub>2</sub> concentration (25 mg L<sup>-1</sup>) for the longest exposure time (60 min); metabolic activities of all algal species we tested were reduced to less than 18% under these conditions. Therefore, while *M. aeruginosa* was sensitive to nano-TiO<sub>2</sub> exposure, it was significantly less sensitive than the four algal species tested.

Another interesting difference between the responses of the algae and cyanobacteria in the HTS assay was that the cyanobacteria were generally less sensitive than the algae to light

exposure alone. Cyanobacteria as a group have higher temperature optima than algae [72], so if increased temperature was a key component of the negative effect of illumination in our HTS assay, the lower temperature optima of algae may explain their higher sensitivity to illumination. As mentioned above photoinhibition is another possible mechanism for the negative effect of illumination in our HTS assay, and previous studies have demonstrated photoinhibition in cyanobacteria [73,74]. In the current study *M. aeruginosa* and *Gloeocapsa* showed slight reductions in metabolic activity with illumination alone, mainly in the longer exposure times, indicating photoinhibition may have occurred for these species. However, these decreases were not nearly as large as the decreases observed for the algae. Cells of both of these species are enveloped in mucilage—extensively in the case of *Gloeocapsa*. Mucilage has been shown to protect many cyanobacterial taxa, including *Gloeocapsa*, from harmful effects of UV-light [75] and may have been instrumental in the minimal effects of light exposure in these two taxa. Finally, *S. cedrorum* showed no significant reduction in metabolic activity with illumination alone, but in fact showed an increase in metabolic activity for the 15 min exposure, possibly due to warming associated with the illumination. *S. cedrorum* did show a significant decrease in the relative abundance of viable cells with 30 min exposure to illumination alone, indicating some sensitivity of this species to illumination. Interestingly, a decrease in viable *S. cedrorum* cells was not seen in the nano-TiO<sub>2</sub> treatments. One possible explanation could be that the increase in available nutrients resulting from photolysis of the DOM in the Lake Michigan water by nano-TiO<sub>2</sub> compensated for the illumination stress. Another possible explanation is that absorption of UV radiation by nano-TiO<sub>2</sub> provided the *S. cedrorum* cells with some protection from damage caused by UV exposure.

The higher nano-TiO<sub>2</sub> resistance of cyanobacteria as compared to algae may be due to fundamental differences in cell structure, as algae are eukaryotic and cyanobacteria are prokaryotic. For example, cyanobacterial cell walls are composed of peptidoglycan, whereas diatom cell walls are composed of silica and green algal cell walls are composed of cellulose. It is possible that these differences in cell wall structure may contribute to different levels of resistance to ROS. Our microscopic observations of three of the algal species (two diatoms and one green alga) demonstrated that nano-TiO<sub>2</sub> exposure resulted in rupture of the cell walls and cell membranes and leakage of cytoplasm out of the cell. Cyanobacterial cells, especially *Gloeocapsa* and *S. cedrorum* were not negatively impacted by nano-TiO<sub>2</sub> exposure, suggesting that their cell walls may have been more resistant to ROS. *Gloeocapsa* in particular are known to encase their cells in a thick sheath of mucilage [76] that likely plays a role in protecting the cells from ROS damage. Recent work has also suggested that microcystin, a toxin produced by many cyanobacterial taxa, can help protect cyanobacteria from oxidative stress by binding to proteins involved in photosynthesis and carbon sequestration and protecting them from oxidation [77]. *Microcystis aeruginosa* is a well-known producer of microcystin [78], and a microcystin-producing strain of *Gloeocapsa* was recently isolated from the Salton Sea, in California, USA [79]. Therefore, it is possible that microcystin production could contribute to higher resistance of cyanobacteria to oxidative damage from ROS produced by nano-TiO<sub>2</sub>.

The higher resistance of cyanobacteria to a titanium dioxide nanomaterial (PW6) relative to algae has important ecological implications. Cyanobacteria and algae fill a similar ecological niche, both being aquatic phototrophs, and they compete for resources within aquatic habitats. However, cyanobacteria have a higher carbon to nitrogen ratio and lower digestibility than algae, making cyanobacteria a less nutritious food source for aquatic consumers [37]. Cyanobacteria are also significant because some cyanobacterial taxa can produce toxins and cyanobacterial blooms can be a significant hazard to human and animal health [38]. *Microcystis aeruginosa* is a common component of harmful algal blooms (HABs) and produces microcystin [78], a water soluble toxin that is lethal to many aquatic organisms, including zooplankton

and fish [80], and can cause serious damage to the liver of animals, including humans [81]. *Gloeocapsa* has also been identified as a microcystin producer within HABs [79]. Therefore, the higher resistance of cyanobacteria to PW6 that was revealed in our study suggests that exposure to titanium dioxide nanomaterials in aquatic environments has the potential to alter the distribution of phototrophic microbial taxa within freshwater ecosystems in favor of cyanobacteria, which could have significant implications for environmental and human health.

## Supporting Information

**S1 Fig. Nano-TiO<sub>2</sub> effects on algae in the dark.** Relative metabolic activity of algae in Lake Michigan water after 15 min (red), 30 min (blue) and 60 min (black) exposures to nano-TiO<sub>2</sub> (PW6) under dark conditions. Values are reported as mean of 4 replicates ± standard deviation.  
(PDF)

**S2 Fig. Nano-TiO<sub>2</sub> effects on cyanobacteria in the dark.** Relative metabolic activity of cyanobacteria in Lake Michigan water after 15 min (red), 30 min (blue) and 60 min (black) exposures to nano-TiO<sub>2</sub> (PW6) under dark conditions. Values are reported as mean of 4 replicates ± standard deviation.  
(PDF)

## Acknowledgments

We thank S. Fernandez Dunne for her assistance in high throughput analysis, Martin Berg for his advice regarding statistical analyses, F. Bryan Pickett for use of his growth chamber, and Sylvia Lee for helpful discussions. Furthermore, we thank the staff from the Evanston drinking water plant for help in sampling Lake Michigan water.

## Author Contributions

Conceived and designed the experiments: CTTB CGP TT KAG JFG JJK. Performed the experiments: CTTB. Analyzed the data: CTTB JJK. Contributed reagents/materials/analysis tools: CGP KAG JFG JJK. Wrote the paper: CTTB CGP TT KAG JFG JJK.

## References

1. Chen X, Mao SS. Titanium dioxide nanomaterials: Synthesis, properties, modifications, and applications. *Chem Rev.* 2007; 107: 2891–2959. PMID: [17590053](#)
2. Weir A, Westerhoff P, Fabricius L, Hristovski K, von Goetz N. Titanium dioxide nanoparticles in food and personal care products. *Environ Sci Technol.* 2012; 46: 2242–2250. doi: [10.1021/es204168d](#) PMID: [22260395](#)
3. Chen J, Liu M, Zhang L, Zhang J, Jin L. Application of nano TiO<sub>2</sub> towards polluted water treatment combined with electro-photochemical method. *Water Res.* 2003; 37: 3815–3820. PMID: [12909099](#)
4. Robichaud CO, Uyar AE, Darby MR, Zucker LG, Wiesner MR. Estimates of upper bounds and trends in nano-TiO<sub>2</sub> production as a basis for exposure assessment. *Environ Sci Technol.* 2009; 43: 4227–4233. PMID: [19603627](#)
5. United States Geological Survey. Mineral commodity summaries. 2008: 178–181.
6. Martirosyan A, Schneider Y. Engineered nanomaterials in food: Implications for food safety and consumer health. *Int J Environ Res Public Health.* 2014; 11: 5720–5750. doi: [10.3390/ijerph110605720](#) PMID: [24879486](#)
7. Kiser M, Westerhoff P, Benn T, Wang Y, Perez-Rivera J, Hristovski K. Titanium nanomaterial removal and release from wastewater treatment plants. *Environ Sci Technol.* 2009; 43: 6757–6763. PMID: [19764246](#)

8. Westerhoff P, Song G, Hristovski K, Kiser MA. Occurrence and removal of titanium at full scale wastewater treatment plants: Implications for TiO<sub>2</sub> nanomaterials. *J Environ Monit*. 2011; 13: 1195–1203. doi: [10.1039/c1em10017c](https://doi.org/10.1039/c1em10017c) PMID: [21494702](https://pubmed.ncbi.nlm.nih.gov/21494702/)
9. Kaegi R, Ulrich A, Sinnet B, Vonbank R, Wichser A, Zuleeg S, et al. Synthetic TiO<sub>2</sub> nanoparticle emission from exterior facades into the aquatic environment. *Environ Pollut*. 2008; 156: 233–239. doi: [10.1016/j.envpol.2008.08.004](https://doi.org/10.1016/j.envpol.2008.08.004) PMID: [18824285](https://pubmed.ncbi.nlm.nih.gov/18824285/)
10. Tong T, Binh CTT, Kelly JJ, Gaillard J-F, Gray KA. Cytotoxicity of commercial nano-TiO<sub>2</sub> to escherichia coli assessed by high-throughput screening: Effects of environmental factors. *Water Res*. 2013; 47: 2352–2362. doi: [10.1016/j.watres.2013.02.008](https://doi.org/10.1016/j.watres.2013.02.008) PMID: [23466221](https://pubmed.ncbi.nlm.nih.gov/23466221/)
11. Federici G, Shaw BJ, Handy RD. Toxicity of titanium dioxide nanoparticles to rainbow trout (*Oncorhynchus mykiss*): Gill injury, oxidative stress, and other physiological effects. *Aquat Toxicol*. 2007; 84: 415–430. PMID: [17727975](https://pubmed.ncbi.nlm.nih.gov/17727975/)
12. Griffitt RJ, Luo J, Gao J, Bonzongo J, Barber DS. Effects of particle composition and species on toxicity of metallic nanomaterials in aquatic organisms. *Environ Toxicol Chem*. 2008; 27: 1972–1978. doi: [10.1897/08-002.1](https://doi.org/10.1897/08-002.1) PMID: [18690762](https://pubmed.ncbi.nlm.nih.gov/18690762/)
13. Reeves JF, Davies SJ, Dodd NJ, Jha AN. Hydroxyl radicals (OH) are associated with titanium dioxide (TiO<sub>2</sub>) nanoparticle-induced cytotoxicity and oxidative DNA damage in fish cells. *Mutat Res*. 2008; 640: 113–122. doi: [10.1016/j.mrfmmm.2007.12.010](https://doi.org/10.1016/j.mrfmmm.2007.12.010) PMID: [18258270](https://pubmed.ncbi.nlm.nih.gov/18258270/)
14. Lovern SB, Klaper R. *Daphnia magna* mortality when exposed to titanium dioxide and fullerene (C60) nanoparticles. *Environ Toxicol Chem*. 2006; 25: 1132–1137. PMID: [16629153](https://pubmed.ncbi.nlm.nih.gov/16629153/)
15. Blaise C, Gagne F, Ferard J, Eullaffroy P. Ecotoxicity of selected nano-materials to aquatic organisms. *Environ Toxicol*. 2008; 23: 591–598. doi: [10.1002/tox.20402](https://doi.org/10.1002/tox.20402) PMID: [18528913](https://pubmed.ncbi.nlm.nih.gov/18528913/)
16. Velzeboer I, Hendriks AJ, Ragas AM, Van de Meent D. Nanomaterials in the environment aquatic ecotoxicity tests of some nanomaterials. *Environ Toxicol Chem*. 2008; 27: 1942–1947. PMID: [19086210](https://pubmed.ncbi.nlm.nih.gov/19086210/)
17. Binh C, Tong T, Gaillard J-F, Gray K, Kelly J. Common freshwater bacteria vary in their responses to short-term exposure to nano-TiO<sub>2</sub>. *Environ Toxicol Chem*. 2014; 33: 317–327. doi: [10.1002/etc.2442](https://doi.org/10.1002/etc.2442) PMID: [24352762](https://pubmed.ncbi.nlm.nih.gov/24352762/)
18. Binh CTT, Tong T, Gaillard J-F, Gray KA, Kelly JJ. Acute effects of TiO<sub>2</sub> nanomaterials on the viability and taxonomic composition of aquatic bacterial communities assessed via high-throughput screening and next generation sequencing. *PloS One*. 2014; 9: e106280. doi: [10.1371/journal.pone.0106280](https://doi.org/10.1371/journal.pone.0106280) PMID: [25162615](https://pubmed.ncbi.nlm.nih.gov/25162615/)
19. Hund-Rinke K, Simon M. Ecotoxic effect of photocatalytic active nanoparticles (TiO<sub>2</sub>) on algae and daphnids. *Environ Sci Pollut Res*. 2006; 13: 225–232. PMID: [16910119](https://pubmed.ncbi.nlm.nih.gov/16910119/)
20. Warheit DB, Hoke RA, Finlay C, Donner EM, Reed KL, Sayes CM. Development of a base set of toxicity tests using ultrafine TiO<sub>2</sub> particles as a component of nanoparticle risk management. *Toxicol Lett*. 2007; 171: 99–110. PMID: [17566673](https://pubmed.ncbi.nlm.nih.gov/17566673/)
21. Ji J, Long Z, Lin D. Toxicity of oxide nanoparticles to the green algae *Chlorella* sp. *Chem Eng J*. 2011; 170: 525–530.
22. Sadiq IM, Dalai S, Chandrasekaran N, Mukherjee A. Ecotoxicity study of titania (TiO<sub>2</sub>) NPs on two microalgae species: *Scenedesmus* sp. and *Chlorella* sp. *Ecotoxicol Environ Saf*. 2011; 74: 1180–1187. doi: [10.1016/j.ecoenv.2011.03.006](https://doi.org/10.1016/j.ecoenv.2011.03.006) PMID: [21481931](https://pubmed.ncbi.nlm.nih.gov/21481931/)
23. Dalai S, Pakrashi S, Nirmala MJ, Chaudhri A, Chandrasekaran N, Mandal A, et al. Cytotoxicity of TiO<sub>2</sub> nanoparticles and their detoxification in a freshwater system. *Aquat Toxicol*. 2013; 138: 1–11. doi: [10.1016/j.aquatox.2013.04.005](https://doi.org/10.1016/j.aquatox.2013.04.005) PMID: [23680676](https://pubmed.ncbi.nlm.nih.gov/23680676/)
24. Chen L, Zhou L, Liu Y, Deng S, Wu H, Wang G. Toxicological effects of nanometer titanium dioxide (nano-TiO<sub>2</sub>) on *Chlamydomonas reinhardtii*. *Ecotoxicol Environ Saf*. 2012; 84: 155–162. doi: [10.1016/j.ecoenv.2012.07.019](https://doi.org/10.1016/j.ecoenv.2012.07.019) PMID: [22883605](https://pubmed.ncbi.nlm.nih.gov/22883605/)
25. Wang J, Zhang X, Chen Y, Sommerfeld M, Hu Q. Toxicity assessment of manufactured nanomaterials using the unicellular green alga *Chlamydomonas reinhardtii*. *Chemosphere*. 2008; 73: 1121–1128. doi: [10.1016/j.chemosphere.2008.07.040](https://doi.org/10.1016/j.chemosphere.2008.07.040) PMID: [18768203](https://pubmed.ncbi.nlm.nih.gov/18768203/)
26. Aruoja V, Dubourguier H, Kasemets K, Kahru A. Toxicity of nanoparticles of CuO, ZnO and TiO<sub>2</sub> to microalgae *Pseudokirchneriella subcapitata*. *Sci Total Environ*. 2009; 407: 1461–1468. doi: [10.1016/j.scitotenv.2008.10.053](https://doi.org/10.1016/j.scitotenv.2008.10.053) PMID: [19038417](https://pubmed.ncbi.nlm.nih.gov/19038417/)
27. Hund-Rinke K, Schlich K, Wenzel A. TiO<sub>2</sub> nanoparticles—relationship between dispersion preparation method and ecotoxicity in the algal growth test. *Umweltwissenschaften und Schadstoff-Forschung*. 2010; 22: 517–528.
28. Hartmann N, Von der Kammer F, Hofmann T, Baalousha M, Ottofuelling S, Baun A. Algal testing of titanium dioxide nanoparticles—testing considerations, inhibitory effects and modification of cadmium bioavailability. *Toxicology*. 2010; 269: 190–197. doi: [10.1016/j.tox.2009.08.008](https://doi.org/10.1016/j.tox.2009.08.008) PMID: [19686796](https://pubmed.ncbi.nlm.nih.gov/19686796/)

29. Domingos RF, Tufenkji N, Wilkinson KJ. Aggregation of titanium dioxide nanoparticles: Role of a fulvic acid. *Environ Sci Technol*. 2009; 43: 1282–1286. PMID: [19350891](#)
30. Shih Y, Liu W, Su Y. Aggregation of stabilized TiO<sub>2</sub> nanoparticle suspensions in the presence of inorganic ions. *Environ Toxicol Chem*. 2012; 31: 1693–1698. doi: [10.1002/etc.1898](#) PMID: [22639241](#)
31. Kulacki KJ, Cardinale BJ. Effects of nano-titanium dioxide on freshwater algal population dynamics. *PLoS One*. 2012; 7: e47130. doi: [10.1371/journal.pone.0047130](#) PMID: [23071735](#)
32. Li M, Pokhrel S, Jin X, Mädler L, Damoiseaux R, Hoek EM. Stability, bioavailability, and bacterial toxicity of ZnO and iron-doped ZnO nanoparticles in aquatic media. *Environ Sci Technol*. 2010; 45: 755–761. doi: [10.1021/es102266g](#) PMID: [21133426](#)
33. Li M, Noriega-Trevino ME, Nino-Martinez N, Marambio-Jones C, Wang J, Damoiseaux R, et al. Synergistic bactericidal activity of Ag-TiO<sub>2</sub> nanoparticles in both light and dark conditions. *Environ Sci Technol*. 2011; 45: 8989–8995. doi: [10.1021/es201675m](#) PMID: [21866941](#)
34. Jin X, Li M, Wang J, Marambio-Jones C, Peng F, Huang X, et al. High-throughput screening of silver nanoparticle stability and bacterial inactivation in aquatic media: Influence of specific ions. *Environ Sci Technol*. 2010; 44: 7321–7328. doi: [10.1021/es100854g](#) PMID: [20873875](#)
35. Tong T, Shereef A, Wu J, Binh CTT, Kelly JJ, Gaillard J-F, et al. Effects of material morphology on the phototoxicity of nano-TiO<sub>2</sub> to bacteria. *Environ Sci Technol*. 2013; 47: 12486–12495. doi: [10.1021/es403079h](#) PMID: [24083465](#)
36. Scott JT, Marcarelli AM. Cyanobacteria in freshwater benthic environments. In: Anonymous Ecology of Cyanobacteria II.: Springer; 2012. pp. 271–289.
37. Lampert W. Laboratory studies on zooplankton-cyanobacteria interactions. *N Z J Mar Freshwat Res*. 1987; 21: 483–490.
38. Christoffersen K. Ecological implications of cyanobacterial toxins in aquatic food webs. *Phycologia*. 1996; 35: 42–50.
39. Cherchi C, Gu AZ. Impact of titanium dioxide nanomaterials on nitrogen fixation rate and intracellular nitrogen storage in *Anabaena variabilis*. *Environ Sci Technol*. 2010; 44: 8302–8307. doi: [10.1021/es101658p](#) PMID: [20853867](#)
40. Drury B, Scott J, Rosi-Marshall EJ, Kelly JJ. Triclosan exposure increases triclosan resistance and influences taxonomic composition of benthic bacterial communities. *Environ Sci Technol*. 2013; 47: 8923–8930. doi: [10.1021/es401919k](#) PMID: [23865377](#)
41. Orvos DR, Versteeg DJ, Inauen J, Capdevielle M, Rothenstein A, Cunningham V. Aquatic toxicity of triclosan. *Environ Toxicol Chem*. 2002; 21: 1338–1349. PMID: [12109732](#)
42. Dorsey J, Yentsch CM, Mayo S, McKenna C. Rapid analytical technique for the assessment of cell metabolic activity in marine microalgae. *Cytometry*. 1989; 10: 622–628. PMID: [2776579](#)
43. Romero OC, Straub AP, Kohn T, Nguyen TH. Role of temperature and suwannee river natural organic matter on inactivation kinetics of rotavirus and bacteriophage MS2 by solar irradiation. *Environ Sci Technol*. 2011; 45: 10385–10393. doi: [10.1021/es202067f](#) PMID: [22017181](#)
44. WMO. Guide to meteorological instruments and methods of observation. Geneva, Switzerland: World Meteorological Organization; 2008.
45. USEPA. Short-term methods for estimating the chronic toxicity of effluents and receiving waters to freshwater organisms. Washington, DC: US Environmental Protection Agency; 2002.
46. Peterson CG, Dudley TL, Hoagland KD, Johnson LM. Infection, growth, and community-level consequences of a diatom pathogen in a sonoran desert stream. *J Phycol*. 1993; 29: 442–452.
47. Peterson CG, Vormittag KA, Valett HM. Ingestion and digestion of epilithic algae by larval insects in a heavily grazed montane stream. *Freshwat Biol*. 1998; 40: 607–623.
48. Franklin N, Adams M, Stauber J, Lim R. Development of an improved rapid enzyme inhibition bioassay with marine and freshwater microalgae using flow cytometry. *Arch Environ Contam Toxicol*. 2001; 40: 469–480. PMID: [11525489](#)
49. Adams MS, Stauber JL. Development of a whole-sediment toxicity test using a benthic marine microalga. *Environ Toxicol Chem*. 2004; 23: 1957–1968. PMID: [15352485](#)
50. Feng Y, Chang X, Zhao L, Li X, Li W, Jiang Y. Nanaomycin A methyl ester, an actinomycete metabolite: Algicidal activity and the physiological response of *Microcystis aeruginosa*. *Ecol Eng*. 2013; 53: 306–312.
51. Gilbert F, Galgani F, Cadiou Y. Rapid assessment of metabolic activity in marine microalgae: Application in ecotoxicological tests and evaluation of water quality. *Mar Biol*. 1992; 112: 199–205.
52. Cronin MT, Netzeva TI, Dearden JC, Edwards R, Worgan AD. Assessment and modeling of the toxicity of organic chemicals to *Chlorella vulgaris*: Development of a novel database. *Chem Res Toxicol*. 2004; 17: 545–554. PMID: [15089097](#)



53. Machado MD, Soares EV. Optimization of a microplate-based assay to assess esterase activity in the alga *pseudokirchneriella subcapitata*. *Water Air Soil Pollut.* 2013; 224: 1–11.
54. Szelag-Wasielewska E. Phytoplankton community structure in non-stratified lakes of Pomerania (NW Poland). *Hydrobiologia.* 2003; 506: 229–236.
55. Agusti S, Duarte CM, Canfield DE. Phytoplankton abundance in Florida lakes: Evidence for the frequent lack of nutrient limitation. *Limnol Oceanogr.* 1990; 35: 181–187.
56. Cohen RR, Dresler PV, Phillips EJ, Cory RL. The effect of the asiatic clam, *Corbicula fluminea*, on phytoplankton of the Potomac River, Maryland. *Limnol Oceanogr.* 1984; 29: 170–180.
57. Smith TE, Stevenson RJ, Caraco NF, Cole JJ. Changes in phytoplankton community structure during the zebra mussel (*Dreissena polymorpha*) invasion of the Hudson River (New York). *J Plankton Res.* 1998; 20: 1567–1579.
58. Häder D, Lebert M, Helbling EW. Effects of solar radiation on the Patagonian macroalga *Enteromorpha linza* (L.) J. Agardh—Chlorophyceae. *Journal of Photochemistry and Photobiology B: Biology.* 2001; 62: 43–54. PMID: [11693366](#)
59. Hanelt D, Huppertz K, Nultsch W. Photoinhibition of photosynthesis and its recovery in red algae. *Botanica Acta.* 1992; 105: 278–284.
60. Lidholm J, Gustafsson P, Öquist G. Photoinhibition of photosynthesis and its recovery in the green alga *Chlamydomonas reinhardtii*. *Plant Cell Physiol.* 1987; 28: 1133–1140.
61. Häder D, Lebert M, Sinha RP, Barbieri ES, Helbling EW. Role of protective and repair mechanisms in the inhibition of photosynthesis in marine macroalgae. *Photochem Photobiol Sci.* 2002; 1: 809–814. PMID: [12656483](#)
62. Cooper WJ, Zika RG. Photochemical formation of hydrogen peroxide in surface and ground waters exposed to sunlight. *Science.* 1983; 220: 711–712. PMID: [17813875](#)
63. Sun TY, Gottschalk F, Hungerbühler K, Nowack B. Comprehensive probabilistic modelling of environmental emissions of engineered nanomaterials. *Environ Pollut.* 2014; 185: 69–76. doi: [10.1016/j.envpol.2013.10.004](#) PMID: [24220022](#)
64. Boncagni NT, Otaegui JM, Warner E, Curran T, Ren J, Fidalgo de Cortalezzi MM. Exchange of TiO<sub>2</sub> nanoparticles between streams and streambeds. *Environ Sci Technol.* 2009; 43: 7699–7705. doi: [10.1021/es900424n](#) PMID: [19921881](#)
65. Keller AA, Wang H, Zhou D, Lenihan HS, Cherr G, Cardinale BJ, et al. Stability and aggregation of metal oxide nanoparticles in natural aqueous matrices. *Environ Sci Technol.* 2010; 44: 1962–1967. doi: [10.1021/es902987d](#) PMID: [20151631](#)
66. Kaney AR. Enzymatic characterization of a phenylalanine auxotroph of the blue-green bacterium *Synechococcus cedrorum*. *Archiv für Mikrobiologie.* 1973; 92: 139–142. doi: [10.1055/s-0033-1360260](#) PMID: [24715412](#)
67. Grätzel CK, Jirousek M, Grätzel M. Decomposition of organophosphorus compounds on photoactivated TiO<sub>2</sub> surfaces. *J Mol Catal.* 1990; 60: 375–387.
68. Waki K, Wang L, Nohara K, Hidaka H. Photocatalyzed mineralization of nitrogen-containing compounds at TiO<sub>2</sub>/H<sub>2</sub>O interfaces. *J Mol Catal A Chem.* 1995; 95: 53–59.
69. Loza V, Perona E, Mateo P. Specific responses to nitrogen and phosphorus enrichment in cyanobacteria: Factors influencing changes in species dominance along eutrophic gradients. *Water Res.* 2014; 48: 622–631. doi: [10.1016/j.watres.2013.10.014](#) PMID: [24200011](#)
70. Muñoz-Martín M, Mateo P, Leganés F, Fernández-Piñas F. A battery of bioreporters of nitrogen bioavailability in aquatic ecosystems based on cyanobacteria. *Sci Total Environ.* 2014; 475: 169–179. doi: [10.1016/j.scitotenv.2013.07.015](#) PMID: [23910393](#)
71. Kim S, Lee D. Preparation of TiO<sub>2</sub>-coated hollow glass beads and their application to the control of algal growth in eutrophic water. *Microchem J.* 2005; 80: 227–232.
72. Paerl HW, Hall NS, Calandrino ES. Controlling harmful cyanobacterial blooms in a world experiencing anthropogenic and climatic-induced change. *Sci Total Environ.* 2011; 409: 1739–1745. doi: [10.1016/j.scitotenv.2011.02.001](#) PMID: [21345482](#)
73. Samuelsson G, Lonneborg A, Rosenqvist E, Gustafsson P, Öquist G. Photoinhibition and reactivation of photosynthesis in the cyanobacterium *Anacystis nidulans*. *Plant Physiol.* 1985; 79: 992–995. PMID: [16664559](#)
74. Whitlam G, Cold G. Photoinhibition of photosynthesis in the cyanobacterium *Microcystis aeruginosa*. *Planta.* 1983; 157: 561–566. doi: [10.1007/BF00396889](#) PMID: [24264423](#)
75. Garcia-Pichel F, Wingard CE, Castenholz RW. Evidence regarding the UV sunscreen role of a mycosporine-like compound in the cyanobacterium *Gloeocapsa* sp. *Appl Environ Microbiol.* 1993; 59: 170–176. PMID: [16348840](#)

76. Martin TC, Wyatt J. Extracellular investments in blue-green algae with particular emphasis on the genus *Nostoc*. *J Phycol.* 1974; 10: 204–210.
77. Zilliges Y, Kehr J, Meissner S, Ishida K, Mikkat S, Hagemann M, et al. The cyanobacterial hepatotoxin microcystin binds to proteins and increases the fitness of *Microcystis* under oxidative stress conditions. *PLoS One.* 2011; 6: e17615. doi: [10.1371/journal.pone.0017615](https://doi.org/10.1371/journal.pone.0017615) PMID: [21445264](https://pubmed.ncbi.nlm.nih.gov/21445264/)
78. Oh HM, Lee SJ, Jang MH, Yoon BD. Microcystin production by *Microcystis aeruginosa* in a phosphorus-limited chemostat. *Appl Environ Microbiol.* 2000; 66: 176–179. PMID: [10618220](https://pubmed.ncbi.nlm.nih.gov/10618220/)
79. Carmichael WW, Li R. Cyanobacteria toxins in the salton sea. *Saline Systems.* 2006; 2: 1746–1448.
80. Penalzoa R, Rojas M, Vila I, Zambrano F. Toxicity of a soluble peptide from *Microcystis* sp. to zooplankton and fish. *Freshwat Biol.* 1990; 24: 233–240.
81. Žegura B, Sedmak B, Filipič M. Microcystin-LR induces oxidative DNA damage in human hepatoma cell line HepG2. *Toxicol.* 2003; 41: 41–48. PMID: [12467660](https://pubmed.ncbi.nlm.nih.gov/12467660/)
